# Supplementary material for: CO2 in Lyotropic Liquid Crystals: Phase Equilibria Behavior and Rheology
Source: PubMed Central journal article supplement (PMC6419203; doi:10.3390/polym11020309), 2019-02-12
Supplement: polymers-11-00309-s001.pdf [file polymers-11-00309-s001.pdf]

## Supplementary Material

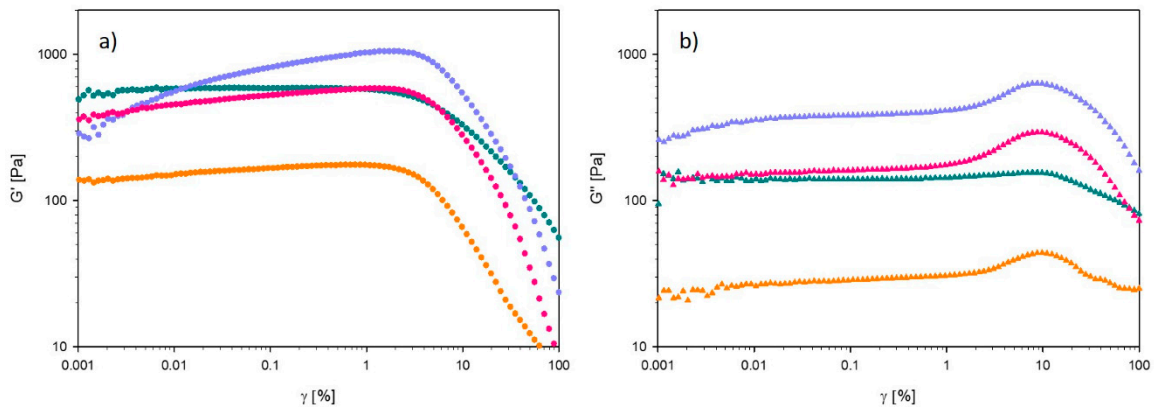

Figure 1. (a) Storage modulus ( $G'$ ) and (b) loss modulus ( $G''$ ) of 60 % L92/10 % MEA  $\alpha=0$  (●),  $\alpha=15$  (●),  $\alpha=27$  (●), and  $\alpha=38$  g CO<sub>2</sub>/kg sample (●), as a function of strain amplitude ( $\gamma$ ).

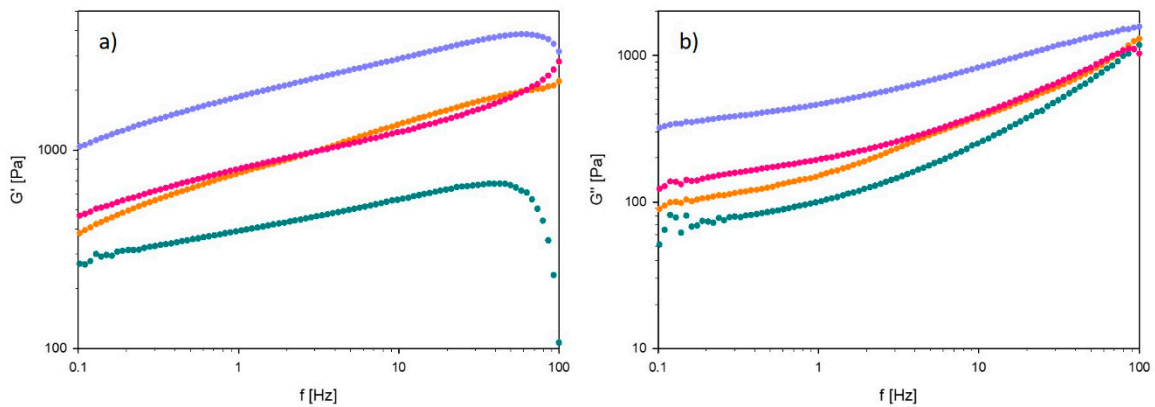

Figure 2. (a) Storage modulus ( $G'$ ) and (b) loss modulus ( $G''$ ) of 60 % L92/10 % MEA  $\alpha=0$  (●),  $\alpha=15$  (●),  $\alpha=27$  (●), and  $\alpha=38$  g CO<sub>2</sub>/kg sample (●), as a function of frequency ( $f$ ).

Data for the loading of 10 % MEA obtained from Putta et al.[1]

| $\alpha$ (g CO <sub>2</sub> /kg sample) | P <sub>CO2</sub> (bar) |
|-----------------------------------------|------------------------|
| 7.21E-04                                | 2.15E-09               |
| 7.28E-02                                | 2.09E-07               |
| 1.45E-01                                | 3.55E-07               |
| 2.17E-01                                | 4.80E-07               |
| 2.89E-01                                | 6.07E-07               |
| 3.61E-01                                | 7.53E-07               |
| 4.33E-01                                | 9.31E-07               |
| 5.05E-01                                | 1.16E-06               |
| 5.77E-01                                | 1.46E-06               |
| 6.49E-01                                | 1.87E-06               |
| 7.21E-01                                | 2.42E-06               |
| 7.93E-01                                | 3.16E-06               |
| 8.65E-01                                | 4.12E-06               |
| 9.37E-01                                | 5.32E-06               |
| 1.01E+00                                | 6.75E-06               |
| 1.08E+00                                | 8.42E-06               |
| 1.15E+00                                | 1.03E-05               |
| 1.23E+00                                | 1.24E-05               |
| 1.30E+00                                | 1.46E-05               |
| 1.37E+00                                | 1.71E-05               |
| 1.44E+00                                | 1.97E-05               |
| 1.51E+00                                | 2.25E-05               |
| 1.59E+00                                | 2.55E-05               |
| 1.66E+00                                | 2.86E-05               |
| 1.73E+00                                | 3.18E-05               |
| 1.80E+00                                | 3.53E-05               |
| 1.87E+00                                | 3.88E-05               |
| 1.95E+00                                | 4.26E-05               |
| 2.02E+00                                | 4.65E-05               |
| 2.09E+00                                | 5.05E-05               |
| 2.16E+00                                | 5.47E-05               |
| 2.23E+00                                | 5.90E-05               |
| 2.31E+00                                | 6.35E-05               |
| 2.38E+00                                | 6.82E-05               |
| 2.45E+00                                | 7.30E-05               |
| 2.52E+00                                | 7.79E-05               |
| 2.59E+00                                | 8.30E-05               |
| 2.67E+00                                | 8.83E-05               |
| 2.74E+00                                | 9.37E-05               |
| 2.81E+00                                | 9.93E-05               |
| 2.88E+00                                | 1.05E-04               |
| 2.95E+00                                | 1.11E-04               |

|          |          |
|----------|----------|
| 3.03E+00 | 1.17E-04 |
| 3.10E+00 | 1.23E-04 |
| 3.17E+00 | 1.29E-04 |
| 3.24E+00 | 1.36E-04 |
| 3.32E+00 | 1.43E-04 |
| 3.39E+00 | 1.50E-04 |
| 3.46E+00 | 1.57E-04 |
| 3.53E+00 | 1.64E-04 |
| 3.60E+00 | 1.71E-04 |
| 3.68E+00 | 1.79E-04 |
| 3.75E+00 | 1.86E-04 |
| 3.82E+00 | 1.94E-04 |
| 3.89E+00 | 2.02E-04 |
| 3.96E+00 | 2.10E-04 |
| 4.04E+00 | 2.19E-04 |
| 4.11E+00 | 2.27E-04 |
| 4.18E+00 | 2.36E-04 |
| 4.25E+00 | 2.45E-04 |
| 4.32E+00 | 2.54E-04 |
| 4.40E+00 | 2.63E-04 |
| 4.47E+00 | 2.73E-04 |
| 4.54E+00 | 2.82E-04 |
| 4.61E+00 | 2.92E-04 |
| 4.68E+00 | 3.02E-04 |
| 4.76E+00 | 3.12E-04 |
| 4.83E+00 | 3.23E-04 |
| 4.90E+00 | 3.34E-04 |
| 4.97E+00 | 3.44E-04 |
| 5.04E+00 | 3.55E-04 |
| 5.12E+00 | 3.66E-04 |
| 5.19E+00 | 3.78E-04 |
| 5.26E+00 | 3.89E-04 |
| 5.33E+00 | 4.01E-04 |
| 5.40E+00 | 4.13E-04 |
| 5.48E+00 | 4.26E-04 |
| 5.55E+00 | 4.38E-04 |
| 5.62E+00 | 4.51E-04 |
| 5.69E+00 | 4.63E-04 |
| 5.76E+00 | 4.77E-04 |
| 5.84E+00 | 4.90E-04 |
| 5.91E+00 | 5.03E-04 |
| 5.98E+00 | 5.17E-04 |
| 6.05E+00 | 5.31E-04 |
| 6.13E+00 | 5.45E-04 |

|          |          |
|----------|----------|
| 6.20E+00 | 5.60E-04 |
| 6.27E+00 | 5.74E-04 |
| 6.34E+00 | 5.89E-04 |
| 6.41E+00 | 6.04E-04 |
| 6.49E+00 | 6.20E-04 |
| 6.56E+00 | 6.35E-04 |
| 6.63E+00 | 6.51E-04 |
| 6.70E+00 | 6.67E-04 |
| 6.77E+00 | 6.84E-04 |
| 6.85E+00 | 7.00E-04 |
| 6.92E+00 | 7.17E-04 |
| 6.99E+00 | 7.34E-04 |
| 7.06E+00 | 7.52E-04 |
| 7.13E+00 | 7.70E-04 |
| 7.21E+00 | 7.87E-04 |
| 7.28E+00 | 8.06E-04 |
| 7.35E+00 | 8.24E-04 |
| 7.42E+00 | 8.43E-04 |
| 7.49E+00 | 8.62E-04 |
| 7.57E+00 | 8.81E-04 |
| 7.64E+00 | 9.01E-04 |
| 7.71E+00 | 9.21E-04 |
| 7.78E+00 | 9.41E-04 |
| 7.85E+00 | 9.62E-04 |
| 7.93E+00 | 9.82E-04 |
| 8.00E+00 | 1.00E-03 |
| 8.07E+00 | 1.02E-03 |
| 8.14E+00 | 1.05E-03 |
| 8.21E+00 | 1.07E-03 |
| 8.29E+00 | 1.09E-03 |
| 8.36E+00 | 1.11E-03 |
| 8.43E+00 | 1.14E-03 |
| 8.50E+00 | 1.16E-03 |
| 8.58E+00 | 1.18E-03 |
| 8.65E+00 | 1.21E-03 |
| 8.72E+00 | 1.23E-03 |
| 8.79E+00 | 1.26E-03 |
| 8.86E+00 | 1.28E-03 |
| 8.94E+00 | 1.31E-03 |
| 9.01E+00 | 1.33E-03 |
| 9.08E+00 | 1.36E-03 |
| 9.15E+00 | 1.38E-03 |
| 9.22E+00 | 1.41E-03 |
| 9.30E+00 | 1.44E-03 |

|          |          |
|----------|----------|
| 9.37E+00 | 1.47E-03 |
| 9.44E+00 | 1.49E-03 |
| 9.51E+00 | 1.52E-03 |
| 9.58E+00 | 1.55E-03 |
| 9.66E+00 | 1.58E-03 |
| 9.73E+00 | 1.61E-03 |
| 9.80E+00 | 1.64E-03 |
| 9.87E+00 | 1.67E-03 |
| 9.94E+00 | 1.70E-03 |
| 1.00E+01 | 1.73E-03 |
| 1.01E+01 | 1.76E-03 |
| 1.02E+01 | 1.80E-03 |
| 1.02E+01 | 1.83E-03 |
| 1.03E+01 | 1.86E-03 |
| 1.04E+01 | 1.89E-03 |
| 1.04E+01 | 1.93E-03 |
| 1.05E+01 | 1.96E-03 |
| 1.06E+01 | 2.00E-03 |
| 1.07E+01 | 2.03E-03 |
| 1.07E+01 | 2.07E-03 |
| 1.08E+01 | 2.10E-03 |
| 1.09E+01 | 2.14E-03 |
| 1.10E+01 | 2.18E-03 |
| 1.10E+01 | 2.22E-03 |
| 1.11E+01 | 2.25E-03 |
| 1.12E+01 | 2.29E-03 |
| 1.12E+01 | 2.33E-03 |
| 1.13E+01 | 2.37E-03 |
| 1.14E+01 | 2.41E-03 |
| 1.15E+01 | 2.45E-03 |
| 1.15E+01 | 2.49E-03 |
| 1.16E+01 | 2.53E-03 |
| 1.17E+01 | 2.58E-03 |
| 1.17E+01 | 2.62E-03 |
| 1.18E+01 | 2.66E-03 |
| 1.19E+01 | 2.71E-03 |
| 1.20E+01 | 2.75E-03 |
| 1.20E+01 | 2.80E-03 |
| 1.21E+01 | 2.84E-03 |
| 1.22E+01 | 2.89E-03 |
| 1.22E+01 | 2.94E-03 |
| 1.23E+01 | 2.98E-03 |
| 1.24E+01 | 3.03E-03 |
| 1.25E+01 | 3.08E-03 |

|          |          |
|----------|----------|
| 1.25E+01 | 3.13E-03 |
| 1.26E+01 | 3.18E-03 |
| 1.27E+01 | 3.23E-03 |
| 1.28E+01 | 3.28E-03 |
| 1.28E+01 | 3.34E-03 |
| 1.29E+01 | 3.39E-03 |
| 1.30E+01 | 3.44E-03 |
| 1.30E+01 | 3.50E-03 |
| 1.31E+01 | 3.55E-03 |
| 1.32E+01 | 3.61E-03 |
| 1.33E+01 | 3.67E-03 |
| 1.33E+01 | 3.72E-03 |
| 1.34E+01 | 3.78E-03 |
| 1.35E+01 | 3.84E-03 |
| 1.35E+01 | 3.90E-03 |
| 1.36E+01 | 3.96E-03 |
| 1.37E+01 | 4.02E-03 |
| 1.38E+01 | 4.08E-03 |
| 1.38E+01 | 4.15E-03 |
| 1.39E+01 | 4.21E-03 |
| 1.40E+01 | 4.28E-03 |
| 1.41E+01 | 4.34E-03 |
| 1.41E+01 | 4.41E-03 |
| 1.42E+01 | 4.47E-03 |
| 1.43E+01 | 4.54E-03 |
| 1.43E+01 | 4.61E-03 |
| 1.44E+01 | 4.68E-03 |
| 1.45E+01 | 4.75E-03 |
| 1.46E+01 | 4.83E-03 |
| 1.46E+01 | 4.90E-03 |
| 1.47E+01 | 4.97E-03 |
| 1.48E+01 | 5.05E-03 |
| 1.48E+01 | 5.12E-03 |
| 1.49E+01 | 5.20E-03 |
| 1.50E+01 | 5.28E-03 |
| 1.51E+01 | 5.36E-03 |
| 1.51E+01 | 5.44E-03 |
| 1.52E+01 | 5.52E-03 |
| 1.53E+01 | 5.60E-03 |
| 1.53E+01 | 5.68E-03 |
| 1.54E+01 | 5.77E-03 |
| 1.55E+01 | 5.85E-03 |
| 1.56E+01 | 5.94E-03 |
| 1.56E+01 | 6.03E-03 |

|          |          |
|----------|----------|
| 1.57E+01 | 6.12E-03 |
| 1.58E+01 | 6.21E-03 |
| 1.59E+01 | 6.30E-03 |
| 1.59E+01 | 6.39E-03 |
| 1.60E+01 | 6.49E-03 |
| 1.61E+01 | 6.58E-03 |
| 1.61E+01 | 6.68E-03 |
| 1.62E+01 | 6.78E-03 |
| 1.63E+01 | 6.88E-03 |
| 1.64E+01 | 6.98E-03 |
| 1.64E+01 | 7.08E-03 |
| 1.65E+01 | 7.18E-03 |
| 1.66E+01 | 7.29E-03 |
| 1.66E+01 | 7.39E-03 |
| 1.67E+01 | 7.50E-03 |
| 1.68E+01 | 7.61E-03 |
| 1.69E+01 | 7.72E-03 |
| 1.69E+01 | 7.83E-03 |
| 1.70E+01 | 7.95E-03 |
| 1.71E+01 | 8.06E-03 |
| 1.71E+01 | 8.18E-03 |
| 1.72E+01 | 8.30E-03 |
| 1.73E+01 | 8.42E-03 |
| 1.74E+01 | 8.54E-03 |
| 1.74E+01 | 8.67E-03 |
| 1.75E+01 | 8.79E-03 |
| 1.76E+01 | 8.92E-03 |
| 1.77E+01 | 9.05E-03 |
| 1.77E+01 | 9.18E-03 |
| 1.78E+01 | 9.31E-03 |
| 1.79E+01 | 9.45E-03 |
| 1.79E+01 | 9.59E-03 |
| 1.80E+01 | 9.72E-03 |
| 1.81E+01 | 9.86E-03 |
| 1.82E+01 | 1.00E-02 |
| 1.82E+01 | 1.02E-02 |
| 1.83E+01 | 1.03E-02 |
| 1.84E+01 | 1.04E-02 |
| 1.84E+01 | 1.06E-02 |
| 1.85E+01 | 1.08E-02 |
| 1.86E+01 | 1.09E-02 |
| 1.87E+01 | 1.11E-02 |
| 1.87E+01 | 1.12E-02 |
| 1.88E+01 | 1.14E-02 |

|          |          |
|----------|----------|
| 1.89E+01 | 1.16E-02 |
| 1.90E+01 | 1.17E-02 |
| 1.90E+01 | 1.19E-02 |
| 1.91E+01 | 1.21E-02 |
| 1.92E+01 | 1.22E-02 |
| 1.92E+01 | 1.24E-02 |
| 1.93E+01 | 1.26E-02 |
| 1.94E+01 | 1.28E-02 |
| 1.95E+01 | 1.30E-02 |
| 1.95E+01 | 1.31E-02 |
| 1.96E+01 | 1.33E-02 |
| 1.97E+01 | 1.35E-02 |
| 1.97E+01 | 1.37E-02 |
| 1.98E+01 | 1.39E-02 |
| 1.99E+01 | 1.41E-02 |
| 2.00E+01 | 1.43E-02 |
| 2.00E+01 | 1.45E-02 |
| 2.01E+01 | 1.48E-02 |
| 2.02E+01 | 1.50E-02 |
| 2.02E+01 | 1.52E-02 |
| 2.03E+01 | 1.54E-02 |
| 2.04E+01 | 1.56E-02 |
| 2.05E+01 | 1.59E-02 |
| 2.05E+01 | 1.61E-02 |
| 2.06E+01 | 1.63E-02 |
| 2.07E+01 | 1.66E-02 |
| 2.08E+01 | 1.68E-02 |
| 2.08E+01 | 1.71E-02 |
| 2.09E+01 | 1.73E-02 |
| 2.10E+01 | 1.76E-02 |
| 2.10E+01 | 1.78E-02 |
| 2.11E+01 | 1.81E-02 |
| 2.12E+01 | 1.83E-02 |
| 2.13E+01 | 1.86E-02 |
| 2.13E+01 | 1.89E-02 |
| 2.14E+01 | 1.92E-02 |
| 2.15E+01 | 1.95E-02 |
| 2.15E+01 | 1.97E-02 |
| 2.16E+01 | 2.00E-02 |
| 2.17E+01 | 2.03E-02 |
| 2.18E+01 | 2.06E-02 |
| 2.18E+01 | 2.09E-02 |
| 2.19E+01 | 2.13E-02 |
| 2.20E+01 | 2.16E-02 |



|          |          |
|----------|----------|
| 2.20E+01 | 2.19E-02 |
| 2.21E+01 | 2.22E-02 |
| 2.22E+01 | 2.25E-02 |
| 2.23E+01 | 2.29E-02 |
| 2.23E+01 | 2.32E-02 |
| 2.24E+01 | 2.36E-02 |
| 2.25E+01 | 2.39E-02 |
| 2.26E+01 | 2.43E-02 |
| 2.26E+01 | 2.47E-02 |
| 2.27E+01 | 2.50E-02 |
| 2.28E+01 | 2.54E-02 |
| 2.28E+01 | 2.58E-02 |
| 2.29E+01 | 2.62E-02 |
| 2.30E+01 | 2.66E-02 |
| 2.31E+01 | 2.70E-02 |
| 2.31E+01 | 2.74E-02 |
| 2.32E+01 | 2.78E-02 |
| 2.33E+01 | 2.82E-02 |
| 2.33E+01 | 2.87E-02 |
| 2.34E+01 | 2.91E-02 |
| 2.35E+01 | 2.96E-02 |
| 2.36E+01 | 3.00E-02 |
| 2.36E+01 | 3.05E-02 |
| 2.37E+01 | 3.10E-02 |
| 2.38E+01 | 3.14E-02 |
| 2.39E+01 | 3.19E-02 |
| 2.39E+01 | 3.24E-02 |
| 2.40E+01 | 3.29E-02 |
| 2.41E+01 | 3.34E-02 |
| 2.41E+01 | 3.40E-02 |
| 2.42E+01 | 3.45E-02 |
| 2.43E+01 | 3.50E-02 |
| 2.44E+01 | 3.56E-02 |
| 2.44E+01 | 3.61E-02 |
| 2.45E+01 | 3.67E-02 |
| 2.46E+01 | 3.73E-02 |
| 2.46E+01 | 3.79E-02 |
| 2.47E+01 | 3.85E-02 |
| 2.48E+01 | 3.91E-02 |
| 2.49E+01 | 3.97E-02 |
| 2.49E+01 | 4.04E-02 |
| 2.50E+01 | 4.10E-02 |
| 2.51E+01 | 4.17E-02 |
| 2.51E+01 | 4.23E-02 |

|          |          |
|----------|----------|
| 2.52E+01 | 4.30E-02 |
| 2.53E+01 | 4.37E-02 |
| 2.54E+01 | 4.44E-02 |
| 2.54E+01 | 4.52E-02 |
| 2.55E+01 | 4.59E-02 |
| 2.56E+01 | 4.66E-02 |
| 2.57E+01 | 4.74E-02 |
| 2.57E+01 | 4.82E-02 |
| 2.58E+01 | 4.90E-02 |
| 2.59E+01 | 4.98E-02 |
| 2.59E+01 | 5.06E-02 |
| 2.60E+01 | 5.14E-02 |
| 2.61E+01 | 5.23E-02 |
| 2.62E+01 | 5.32E-02 |
| 2.62E+01 | 5.41E-02 |
| 2.63E+01 | 5.50E-02 |
| 2.64E+01 | 5.59E-02 |
| 2.64E+01 | 5.68E-02 |
| 2.65E+01 | 5.78E-02 |
| 2.66E+01 | 5.88E-02 |
| 2.67E+01 | 5.98E-02 |
| 2.67E+01 | 6.08E-02 |
| 2.68E+01 | 6.18E-02 |
| 2.69E+01 | 6.29E-02 |
| 2.69E+01 | 6.40E-02 |
| 2.70E+01 | 6.51E-02 |
| 2.71E+01 | 6.62E-02 |
| 2.72E+01 | 6.74E-02 |
| 2.72E+01 | 6.85E-02 |
| 2.73E+01 | 6.97E-02 |
| 2.74E+01 | 7.09E-02 |
| 2.75E+01 | 7.22E-02 |
| 2.75E+01 | 7.35E-02 |
| 2.76E+01 | 7.48E-02 |
| 2.77E+01 | 7.61E-02 |
| 2.77E+01 | 7.74E-02 |
| 2.78E+01 | 7.88E-02 |
| 2.79E+01 | 8.02E-02 |
| 2.80E+01 | 8.17E-02 |
| 2.80E+01 | 8.31E-02 |
| 2.81E+01 | 8.46E-02 |
| 2.82E+01 | 8.62E-02 |
| 2.82E+01 | 8.77E-02 |
| 2.83E+01 | 8.93E-02 |

|          |          |
|----------|----------|
| 2.84E+01 | 9.10E-02 |
| 2.85E+01 | 9.26E-02 |
| 2.85E+01 | 9.44E-02 |
| 2.86E+01 | 9.61E-02 |
| 2.87E+01 | 9.79E-02 |
| 2.87E+01 | 9.97E-02 |
| 2.88E+01 | 1.02E-01 |
| 2.89E+01 | 1.03E-01 |
| 2.90E+01 | 1.05E-01 |
| 2.90E+01 | 1.07E-01 |
| 2.91E+01 | 1.09E-01 |
| 2.92E+01 | 1.12E-01 |
| 2.93E+01 | 1.14E-01 |
| 2.93E+01 | 1.16E-01 |
| 2.94E+01 | 1.18E-01 |
| 2.95E+01 | 1.20E-01 |
| 2.95E+01 | 1.23E-01 |
| 2.96E+01 | 1.25E-01 |
| 2.97E+01 | 1.27E-01 |
| 2.98E+01 | 1.30E-01 |
| 2.98E+01 | 1.32E-01 |
| 2.99E+01 | 1.35E-01 |
| 3.00E+01 | 1.38E-01 |
| 3.00E+01 | 1.40E-01 |
| 3.01E+01 | 1.43E-01 |
| 3.02E+01 | 1.46E-01 |
| 3.03E+01 | 1.49E-01 |
| 3.03E+01 | 1.52E-01 |
| 3.04E+01 | 1.55E-01 |
| 3.05E+01 | 1.58E-01 |
| 3.06E+01 | 1.61E-01 |
| 3.06E+01 | 1.65E-01 |
| 3.07E+01 | 1.68E-01 |
| 3.08E+01 | 1.72E-01 |
| 3.08E+01 | 1.75E-01 |
| 3.09E+01 | 1.79E-01 |
| 3.10E+01 | 1.82E-01 |
| 3.11E+01 | 1.86E-01 |
| 3.11E+01 | 1.90E-01 |
| 3.12E+01 | 1.94E-01 |
| 3.13E+01 | 1.98E-01 |
| 3.13E+01 | 2.02E-01 |
| 3.14E+01 | 2.07E-01 |
| 3.15E+01 | 2.11E-01 |

|          |          |
|----------|----------|
| 3.16E+01 | 2.15E-01 |
| 3.16E+01 | 2.20E-01 |
| 3.17E+01 | 2.25E-01 |
| 3.18E+01 | 2.30E-01 |
| 3.18E+01 | 2.35E-01 |
| 3.19E+01 | 2.40E-01 |
| 3.20E+01 | 2.45E-01 |
| 3.21E+01 | 2.50E-01 |
| 3.21E+01 | 2.56E-01 |
| 3.22E+01 | 2.61E-01 |
| 3.23E+01 | 2.67E-01 |
| 3.24E+01 | 2.73E-01 |
| 3.24E+01 | 2.79E-01 |
| 3.25E+01 | 2.85E-01 |
| 3.26E+01 | 2.91E-01 |
| 3.26E+01 | 2.98E-01 |
| 3.27E+01 | 3.05E-01 |
| 3.28E+01 | 3.12E-01 |
| 3.29E+01 | 3.19E-01 |
| 3.29E+01 | 3.26E-01 |
| 3.30E+01 | 3.33E-01 |
| 3.31E+01 | 3.41E-01 |
| 3.31E+01 | 3.48E-01 |
| 3.32E+01 | 3.56E-01 |
| 3.33E+01 | 3.65E-01 |
| 3.34E+01 | 3.73E-01 |
| 3.34E+01 | 3.82E-01 |
| 3.35E+01 | 3.90E-01 |
| 3.36E+01 | 3.99E-01 |
| 3.36E+01 | 4.09E-01 |
| 3.37E+01 | 4.18E-01 |
| 3.38E+01 | 4.28E-01 |
| 3.39E+01 | 4.38E-01 |
| 3.39E+01 | 4.48E-01 |
| 3.40E+01 | 4.59E-01 |
| 3.41E+01 | 4.70E-01 |
| 3.42E+01 | 4.81E-01 |
| 3.42E+01 | 4.92E-01 |
| 3.43E+01 | 5.04E-01 |
| 3.44E+01 | 5.16E-01 |
| 3.44E+01 | 5.28E-01 |
| 3.45E+01 | 5.40E-01 |
| 3.46E+01 | 5.53E-01 |
| 3.47E+01 | 5.66E-01 |

|          |          |
|----------|----------|
| 3.47E+01 | 5.80E-01 |
| 3.48E+01 | 5.94E-01 |
| 3.49E+01 | 6.08E-01 |
| 3.49E+01 | 6.23E-01 |
| 3.50E+01 | 6.38E-01 |
| 3.51E+01 | 6.53E-01 |
| 3.52E+01 | 6.69E-01 |
| 3.52E+01 | 6.85E-01 |
| 3.53E+01 | 7.01E-01 |
| 3.54E+01 | 7.18E-01 |
| 3.55E+01 | 7.35E-01 |
| 3.55E+01 | 7.53E-01 |
| 3.56E+01 | 7.71E-01 |
| 3.57E+01 | 7.90E-01 |
| 3.57E+01 | 8.09E-01 |
| 3.58E+01 | 8.29E-01 |
| 3.59E+01 | 8.49E-01 |
| 3.60E+01 | 8.69E-01 |
| 3.60E+01 | 8.90E-01 |
| 3.61E+01 | 9.12E-01 |
| 3.62E+01 | 9.33E-01 |
| 3.62E+01 | 9.56E-01 |
| 3.63E+01 | 9.79E-01 |
| 3.64E+01 | 1.00E+00 |
| 3.65E+01 | 1.03E+00 |
| 3.65E+01 | 1.05E+00 |
| 3.66E+01 | 1.08E+00 |
| 3.67E+01 | 1.10E+00 |
| 3.67E+01 | 1.13E+00 |
| 3.68E+01 | 1.16E+00 |
| 3.69E+01 | 1.18E+00 |
| 3.70E+01 | 1.21E+00 |
| 3.70E+01 | 1.24E+00 |
| 3.71E+01 | 1.27E+00 |
| 3.72E+01 | 1.30E+00 |
| 3.73E+01 | 1.33E+00 |
| 3.73E+01 | 1.36E+00 |
| 3.74E+01 | 1.40E+00 |
| 3.75E+01 | 1.43E+00 |
| 3.75E+01 | 1.46E+00 |
| 3.76E+01 | 1.50E+00 |
| 3.77E+01 | 1.53E+00 |
| 3.78E+01 | 1.57E+00 |
| 3.78E+01 | 1.60E+00 |

|          |          |
|----------|----------|
| 3.79E+01 | 1.64E+00 |
| 3.80E+01 | 1.68E+00 |
| 3.80E+01 | 1.72E+00 |
| 3.81E+01 | 1.76E+00 |
| 3.82E+01 | 1.80E+00 |
| 3.83E+01 | 1.84E+00 |
| 3.83E+01 | 1.88E+00 |
| 3.84E+01 | 1.93E+00 |
| 3.85E+01 | 1.97E+00 |
| 3.85E+01 | 2.02E+00 |
| 3.86E+01 | 2.06E+00 |
| 3.87E+01 | 2.11E+00 |
| 3.88E+01 | 2.16E+00 |
| 3.88E+01 | 2.21E+00 |
| 3.89E+01 | 2.26E+00 |
| 3.90E+01 | 2.31E+00 |
| 3.91E+01 | 2.36E+00 |
| 3.91E+01 | 2.41E+00 |
| 3.92E+01 | 2.46E+00 |
| 3.93E+01 | 2.52E+00 |
| 3.93E+01 | 2.57E+00 |
| 3.94E+01 | 2.63E+00 |
| 3.95E+01 | 2.69E+00 |
| 3.96E+01 | 2.75E+00 |
| 3.96E+01 | 2.81E+00 |
| 3.97E+01 | 2.87E+00 |
| 3.98E+01 | 2.93E+00 |
| 3.98E+01 | 2.99E+00 |
| 3.99E+01 | 3.05E+00 |
| 4.00E+01 | 3.12E+00 |
| 4.01E+01 | 3.19E+00 |
| 4.01E+01 | 3.25E+00 |
| 4.02E+01 | 3.32E+00 |
| 4.03E+01 | 3.39E+00 |
| 4.04E+01 | 3.46E+00 |
| 4.04E+01 | 3.54E+00 |
| 4.05E+01 | 3.61E+00 |
| 4.06E+01 | 3.68E+00 |
| 4.06E+01 | 3.76E+00 |
| 4.07E+01 | 3.84E+00 |
| 4.08E+01 | 3.92E+00 |
| 4.09E+01 | 3.99E+00 |
| 4.09E+01 | 4.08E+00 |
| 4.10E+01 | 4.16E+00 |

|          |          |
|----------|----------|
| 4.11E+01 | 4.24E+00 |
| 4.11E+01 | 4.33E+00 |
| 4.12E+01 | 4.41E+00 |
| 4.13E+01 | 4.50E+00 |
| 4.14E+01 | 4.59E+00 |
| 4.14E+01 | 4.68E+00 |
| 4.15E+01 | 4.77E+00 |
| 4.16E+01 | 4.87E+00 |
| 4.16E+01 | 4.96E+00 |
| 4.17E+01 | 5.06E+00 |
| 4.18E+01 | 5.15E+00 |
| 4.19E+01 | 5.25E+00 |
| 4.19E+01 | 5.35E+00 |
| 4.20E+01 | 5.46E+00 |
| 4.21E+01 | 5.56E+00 |
| 4.22E+01 | 5.66E+00 |
| 4.22E+01 | 5.77E+00 |
| 4.23E+01 | 5.88E+00 |
| 4.24E+01 | 5.99E+00 |
| 4.24E+01 | 6.10E+00 |

## References

1. Putta, K. R.; Pinto, D. D. D.; Svendsen, H. F.; Knuutila, H. K., CO<sub>2</sub> Absorption into Loaded Aqueous Mea Solutions: Kinetics Assessment Using Penetration Theory. *International Journal of Greenhouse Gas Control* **2016**, *53*, 338-353, <https://doi.org/10.1016/j.ijggc.2016.08.009>.
